# Supplementary material for: The Edinburgh CT and genetic diagnostic criteria for lobar intracerebral haemorrhage associated with cerebral amyloid angiopathy: model development and diagnostic test accuracy study
Source: PubMed Central journal article supplement (PMC5818029; doi:10.1016/s1474-4422(18)30006-1), 2018-03
Supplement: mmc1.pdf [file mmc1.pdf]

### Supplementary appendix

This appendix formed part of the original submission and has been peer reviewed. We post it as supplied by the authors.

Supplement to: Rodrigues MA, Samarasekera N, Lerpiniere C, et al. The Edinburgh CT and genetic diagnostic criteria for lobar intracerebral haemorrhage associated with cerebral amyloid angiopathy: model development and diagnostic test accuracy study. *Lancet Neurol* 2018; published online Jan 10. [http://dx.doi.org/10.1016/S1474-4422\(18\)30006-1](http://dx.doi.org/10.1016/S1474-4422(18)30006-1).

## **Index test methods**

### **CT head – reformatting**

One trainee neuroradiologist (MAR) reformatted the first diagnostic non-contrast head CT scan performed after ICH onset into standard axial (parallel to a line linking the floor of the sella turcica to the fastigium of the fourth ventricle), coronal (parallel to the posterior surface of the brain stem) and sagittal (parallel to the interhemispheric fissure) planes, with standard slice thickness (5mm), spacing (3mm), and windowing (centre 35, width 80).

## LINCHPIN CT RATING FORM

LINCHPIN ID: \_\_\_\_\_ SCAN DATE: \_\_\_\_\_

READ DATE: \_\_\_\_\_ RATER INITIALS: \_\_\_\_\_

IMAGE SERIES: *Significant series (unenhanced 5mm Axial, coronal & sagittal reformats)*

Grade overall image quality: Poor                      Adequate                      Good

|    |                                                                                                                     |                              |                               |                               |                            |                            |  |  |  |
|----|---------------------------------------------------------------------------------------------------------------------|------------------------------|-------------------------------|-------------------------------|----------------------------|----------------------------|--|--|--|
| 1. | Is there any sign of acute ischaemic change?                                                                        | <input type="checkbox"/> Y   | <input type="checkbox"/> N    | IF NO, GO TO Q.2              |                            |                            |  |  |  |
| a. | On which side of the brain is the ischaemia?                                                                        | <input type="checkbox"/> R   | <input type="checkbox"/> L    | <input type="checkbox"/> BOTH |                            |                            |  |  |  |
| 2. | Is there any acute parenchymal haemorrhage?                                                                         | <input type="checkbox"/> Y   | <input type="checkbox"/> N    | IF NO, GO TO Q.8              |                            |                            |  |  |  |
| a. | Is the main haemorrhage most likely Haemorrhagic Transformation of an Infarct or Primary Intracerebral Haemorrhage? | <input type="checkbox"/> HTI | <input type="checkbox"/> PICH | IF HTI, GO TO Q.8             |                            |                            |  |  |  |
| 3. | Are there multiple sites of acute parenchymal haemorrhage?                                                          | <input type="checkbox"/> Y   | <input type="checkbox"/> N    |                               |                            |                            |  |  |  |
| a. | Characterize each separate acute parenchymal haemorrhage starting with the largest:                                 |                              |                               |                               |                            |                            |  |  |  |
|    |                                                                                                                     | <input type="checkbox"/> 1   | <input type="checkbox"/> 2    | <input type="checkbox"/> 3    | <input type="checkbox"/> 4 | <input type="checkbox"/> 5 |  |  |  |
|    | Left/Right/Central                                                                                                  | <input type="checkbox"/>     | <input type="checkbox"/>      | <input type="checkbox"/>      | <input type="checkbox"/>   | <input type="checkbox"/>   |  |  |  |
|    | Anatomic Location code(s) (site(s) are which the ICH is thought to be centred)                                      | <input type="checkbox"/>     | <input type="checkbox"/>      | <input type="checkbox"/>      | <input type="checkbox"/>   | <input type="checkbox"/>   |  |  |  |
|    | Deep (D), Lobar (L), Mixed lobar & deep (M), Infratentorial (IT) Uncertain (U)                                      | <input type="checkbox"/>     | <input type="checkbox"/>      | <input type="checkbox"/>      | <input type="checkbox"/>   | <input type="checkbox"/>   |  |  |  |

**Anatomic Location Codes for haemorrhages**

| LOBAR                 | FRONTAL                             | DEEP | BASAL GANGLIA                                 |
|-----------------------|-------------------------------------|------|-----------------------------------------------|
| F                     | Frontal lobe (not basal ganglia)    | BG   | Basal ganglia (not thalamus)                  |
| TE                    | Temporal lobe                       | TH   | Thalamus                                      |
| PA                    | Parietal lobe                       | IC   | Internal capsule                              |
| O                     | Occipital lobe                      | EC   | External capsule                              |
| <b>INFRATENTORIAL</b> |                                     | WM   | Deep & periventricular WM and corpus callosum |
| CE                    | Cerebellum                          |      |                                               |
| BS                    | Brainstem (Midbrain, pons, medulla) |      |                                               |

|    |                                                                                            |                            |                            |                                   |
|----|--------------------------------------------------------------------------------------------|----------------------------|----------------------------|-----------------------------------|
| b. | Is there any intraventricular haemorrhage?                                                 | <input type="checkbox"/> Y | <input type="checkbox"/> N |                                   |
| c. | Is there any subarachnoid extension?                                                       | <input type="checkbox"/> Y | <input type="checkbox"/> N | IF YES, GO TO 1D. IF NO, GO TO 1E |
| d. | If there is subarachnoid extension, is this adjacent to the ICH? Record If distant or both | <input type="checkbox"/> Y | <input type="checkbox"/> N |                                   |
| e. | Is there any subdural extension?                                                           | <input type="checkbox"/> Y | <input type="checkbox"/> N |                                   |
| f. | Is there any midline shift or herniation?                                                  | <input type="checkbox"/> Y | <input type="checkbox"/> N |                                   |

|                                                                                                                                                   |                            |  |                            |                            |                            |                            |                                                                                     |
|---------------------------------------------------------------------------------------------------------------------------------------------------|----------------------------|--|----------------------------|----------------------------|----------------------------|----------------------------|-------------------------------------------------------------------------------------|
| 4. Is there a blood/fluid level within any parenchymal haemorrhage? (NOT including an intraventricular fluid level; start with the largest first) |                            |  |                            |                            |                            |                            |  |
|                                                                                                                                                   | <input type="checkbox"/> 1 |  | <input type="checkbox"/> 2 | <input type="checkbox"/> 3 | <input type="checkbox"/> 4 | <input type="checkbox"/> 5 |                                                                                     |
| Blood or fluid level (Y/N)                                                                                                                        | <input type="checkbox"/>   |  | <input type="checkbox"/>   | <input type="checkbox"/>   | <input type="checkbox"/>   | <input type="checkbox"/>   |                                                                                     |

|                                                                                                                                      |                            |  |                            |                            |                            |                            |
|--------------------------------------------------------------------------------------------------------------------------------------|----------------------------|--|----------------------------|----------------------------|----------------------------|----------------------------|
| 5. Describe the border and shape of each separate acute parenchymal haemorrhage starting with the largest first (see examples below) |                            |  |                            |                            |                            |                            |
|                                                                                                                                      | <input type="checkbox"/> 1 |  | <input type="checkbox"/> 2 | <input type="checkbox"/> 3 | <input type="checkbox"/> 4 | <input type="checkbox"/> 5 |
| a. Irregular border? (Y/N)                                                                                                           | <input type="checkbox"/>   |  | <input type="checkbox"/>   | <input type="checkbox"/>   | <input type="checkbox"/>   | <input type="checkbox"/>   |
| b. Finger-like protrusions? (Y/N)                                                                                                    | <input type="checkbox"/>   |  | <input type="checkbox"/>   | <input type="checkbox"/>   | <input type="checkbox"/>   | <input type="checkbox"/>   |
| c. Round/oval? (Y/N)                                                                                                                 | <input type="checkbox"/>   |  | <input type="checkbox"/>   | <input type="checkbox"/>   | <input type="checkbox"/>   | <input type="checkbox"/>   |
| d. Reaches cortex? (Y/N)                                                                                                             | <input type="checkbox"/>   |  | <input type="checkbox"/>   | <input type="checkbox"/>   | <input type="checkbox"/>   | <input type="checkbox"/>   |

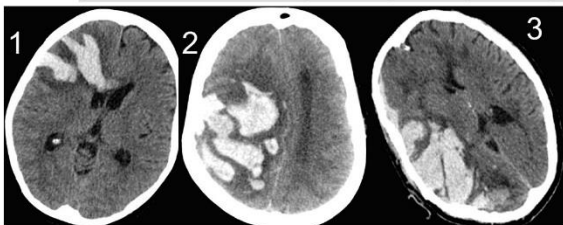

Images 1-3  
**Irregular** border with **finger-like protrusions to cortex**

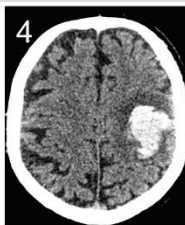

Images 4  
**Irregular** border, reaches **cortex without** finger-like protrusions

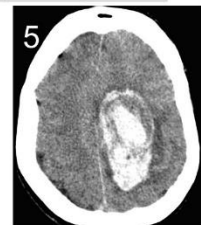

Images 5  
**Regular** border **without** finger-like protrusions & **does not** reach cortex

|                                                                                               |                          |  |                          |                          |                          |                          |  |  |  |  |
|-----------------------------------------------------------------------------------------------|--------------------------|--|--------------------------|--------------------------|--------------------------|--------------------------|--|--|--|--|
| 6. Describe the density of each acute parenchymal haemorrhage starting with the largest first |                          |  |                          |                          |                          |                          |  |  |  |  |
|                                                                                               | 1                        |  | 2                        | 3                        | 4                        | 5                        |  |  |  |  |
| a. Variable density? (Y/N)                                                                    | <input type="checkbox"/> |  | <input type="checkbox"/> | <input type="checkbox"/> | <input type="checkbox"/> | <input type="checkbox"/> |  |  |  |  |
| b. Dilute/seeping appearance? (Y/N)                                                           | <input type="checkbox"/> |  | <input type="checkbox"/> | <input type="checkbox"/> | <input type="checkbox"/> | <input type="checkbox"/> |  |  |  |  |

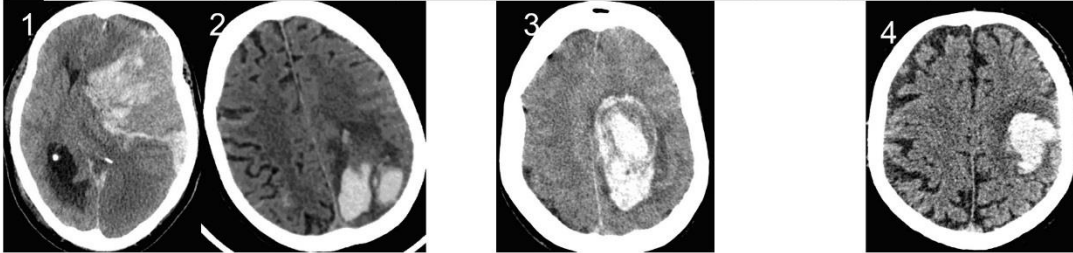

Variable density & dilute/seeping (1-2)  
 Blood in any single ICH has variable **density** & appears 'dilute'/seeping into adjacent brain tissue

Variable density (3)  
 Blood in any single ICH has variable **density** but not 'dilute'

Uniform density (4)  
 Blood in any single ICH has uniform **homogeneous density**

|                                                                                                                                  |                                                                                                                                                                                              |  |  |  |  |                                |                                |                                |  |  |
|----------------------------------------------------------------------------------------------------------------------------------|----------------------------------------------------------------------------------------------------------------------------------------------------------------------------------------------|--|--|--|--|--------------------------------|--------------------------------|--------------------------------|--|--|
| 7. Characterize the parenchymal haemorrhage(s) listed in 3 further. (Do not include extra-axial haemorrhage in the measurements) |                                                                                                                                                                                              |  |  |  |  |                                |                                |                                |  |  |
| a.                                                                                                                               | What is the size of haemorrhage no.1 (mm)?<br>A is largest diameter in the axial plane, B is longest axis perpendicular to A in the axial plane, C is maximum diameter in craniocaudal plane |  |  |  |  | <input type="text" value="A"/> | <input type="text" value="B"/> | <input type="text" value="C"/> |  |  |
| b.                                                                                                                               | What is the size of haemorrhage no.2 (mm)?                                                                                                                                                   |  |  |  |  | <input type="text" value="A"/> | <input type="text" value="B"/> | <input type="text" value="C"/> |  |  |
| c.                                                                                                                               | What is the size of haemorrhage no.3 (mm)?                                                                                                                                                   |  |  |  |  | <input type="text" value="A"/> | <input type="text" value="B"/> | <input type="text" value="C"/> |  |  |
| d.                                                                                                                               | What is the size of haemorrhage no.4 (mm)?                                                                                                                                                   |  |  |  |  | <input type="text" value="A"/> | <input type="text" value="B"/> | <input type="text" value="C"/> |  |  |
| e.                                                                                                                               | What is the size of haemorrhage no.5 (mm)?                                                                                                                                                   |  |  |  |  | <input type="text" value="A"/> | <input type="text" value="B"/> | <input type="text" value="C"/> |  |  |

|                                               |                          |                          |                          |                          |                          |                          |                          |  |  |                                |                                |                  |
|-----------------------------------------------|--------------------------|--------------------------|--------------------------|--------------------------|--------------------------|--------------------------|--------------------------|--|--|--------------------------------|--------------------------------|------------------|
| 8. Are there any <b>old</b> vascular lesions? |                          |                          |                          |                          |                          |                          |                          |  |  | <input type="text" value="Y"/> | <input type="text" value="N"/> | IF NO, GO TO Q.9 |
| a. Classify the old vascular lesions          |                          |                          |                          |                          |                          |                          |                          |  |  |                                |                                |                  |
|                                               | A                        | B                        | C                        | D                        | E                        | F                        | G                        |  |  |                                |                                |                  |
| Code Y/N                                      | <input type="checkbox"/> | <input type="checkbox"/> | <input type="checkbox"/> | <input type="checkbox"/> | <input type="checkbox"/> | <input type="checkbox"/> | <input type="checkbox"/> |  |  |                                |                                |                  |

A = old cortical infarct(s) B = old striatocapsular infarct(s) C = old borderzone infarct(s)  
 D = old lacunes E = old brainstem/cerebellar infarct(s) F = probable old **deep** haemorrhage  
 G = probable old **lobar** haemorrhage

9. Classify any PERIVENTRICULAR LUCENCIES [match "template" below]

diagram from van Swieten et al. JNNP 1990;53:1080-1083

Rating white matter lucency:

- 0= no lucency
- 1= lucency restricted to region adjoining ventricles
- 2= lucency covering entire region from lateral ventricle to cortex

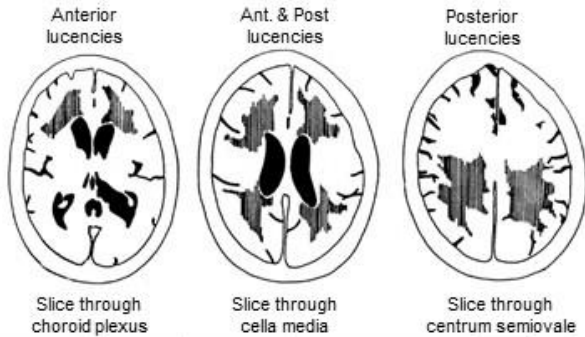

|    |                        |  |       |         |                          |
|----|------------------------|--|-------|---------|--------------------------|
| a. | Anterior white matter  |  | 0,1,2 | Overall | <input type="checkbox"/> |
| b. | Posterior white matter |  | 0,1,2 | Overall | <input type="checkbox"/> |

Exemplar:

AWM = 2 PWM = 1

Source:

<http://www.sbirc.ed.ac.uk/documents/ctandmr%20reading%20form.pdf>

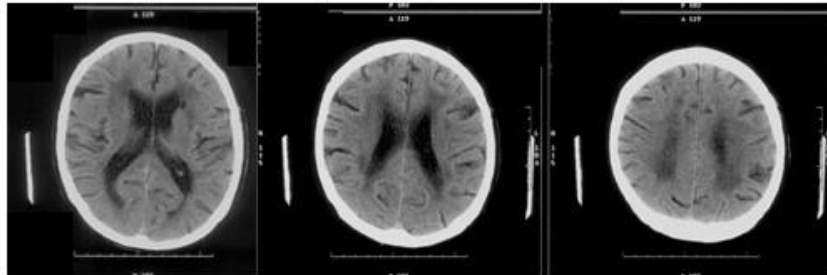

10 Rate any ATROPHY 0 = None. 1 = Moderate 2= Severe [match "template" below]

|    |                |  |         |                          |
|----|----------------|--|---------|--------------------------|
| a. | Central (deep) |  | Overall | <input type="checkbox"/> |
|----|----------------|--|---------|--------------------------|

Source:

<http://www.sbirc.ed.ac.uk/documents/ctandmr%20reading%20form.pdf>

|    |          |  |         |                          |
|----|----------|--|---------|--------------------------|
| b. | Cortical |  | Overall | <input type="checkbox"/> |
|----|----------|--|---------|--------------------------|

11 Comments

12 separate case illustrations of finger-like projections

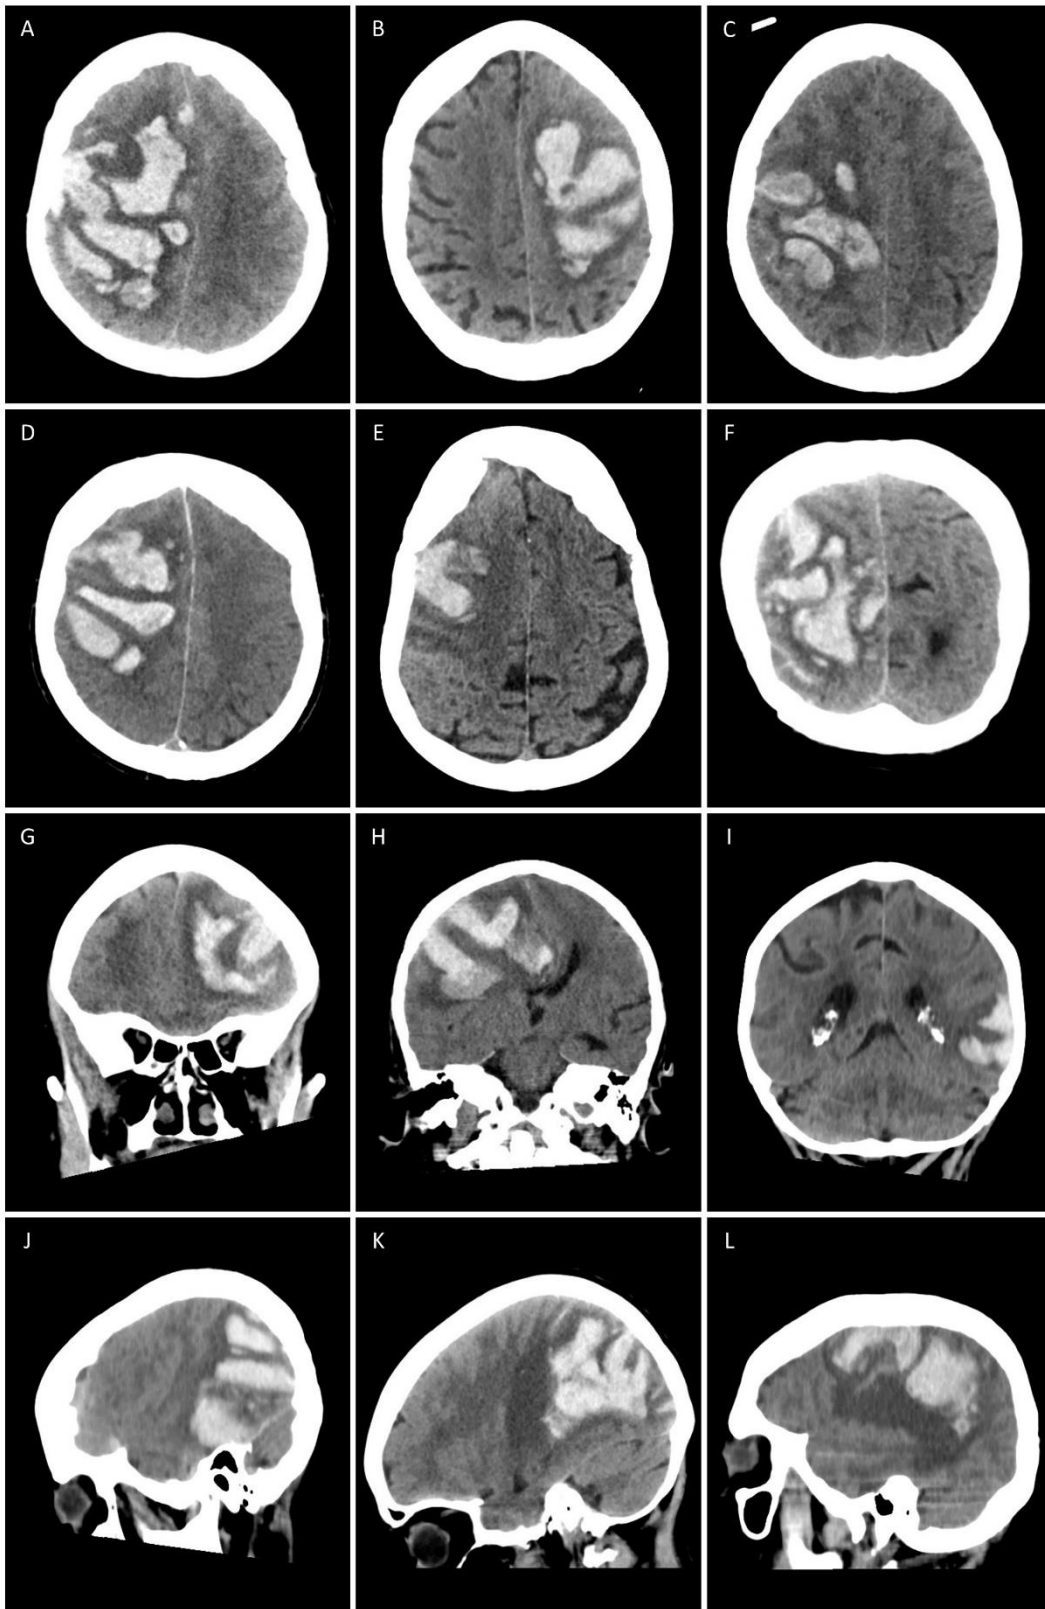

A-E: axial plane; F-I: coronal plane; J-L: sagittal plane

## **CT head – rating of other radiographic features**

ICH volume was assessed using the *ABC/2* method where *A* is the largest diameter of ICH on in the axial plane (cm), *B* is the largest diameter at 90° to *A* on the same slice (cm), and *C* is the maximal cranio-caudal diameter (cm).<sup>1</sup>

ICH shape (e.g. irregular contour, finger-like projections) and appearance (e.g. fluid level and dilute/"seeping" density) was assessed.

We recorded the presence or absence of old infarcts, severity of anterior and posterior white matter lucencies using the van Swieten scale,<sup>2</sup> deep (enlargement of the ventricles) and superficial (enlargement of the sulci) cerebral atrophy using a template based three-point scale (absent/mild, moderate and severe).<sup>3</sup>

We used representative pictures to define specific imaging features – such as irregular contour, finger-like projection, dilute/"seeping" density and atrophy grades – which we defined as present or absent.

One trainee neuroradiologist (MAR) recorded ICH location using the Cerebral Haemorrhage Anatomical RaTing Scale (CHARTS),<sup>4</sup> and re-assessed the scans after a period of three months to evaluate intra-observer agreement.



### **DNA extraction and APOE genotyping**

DNA was extracted from whole blood using a Nucleon Kit (GenProbe) with the BACC3 protocol. DNA samples were re-suspended in 1 ml TE buffer pH 7.5 (10mM Tris-Cl pH 7.5, 1mM EDTA pH 8.0). The yield of the DNA was measured using picogreen and normalised to 10ng/μl before genotyping. DNA was extracted from fresh-frozen brain tissue by homogenising using buffer ATL with proteinase K and incubating at 56°C on a thermomixer at 1000 rpm then isolated using Qiagen DNeasy blood and tissue kit. DNA samples were re-suspended in 200μl of Qiagen elution buffer and normalised to 10ng/μl before genotyping. DNA was extracted from formalin fixed paraffin embedded tissue brain tissue using the Covaris E220 Focused Ultra Sonicator and the truXTRAC FFPE DNA kit, following the genomic DNA extraction protocol. 20μm tissue scrolls were deparaffinised by sonication for 2 x 5 minute periods before overnight incubation on a thermomixer at 56°C with proteinase K. Crosslinking was reversed by incubation at 80°C for 1 hour before purification in spin columns and elution in 50μL of Covaris Buffer BE (5mM Tris HCl pH 8.5).

Genotypes for two APOE single-nucleotide polymorphisms (rs429358 and rs7412) were determined using TaqMan single-nucleotide polymorphism genotyping assays (Applied Biosystems, Foster City, CA) on a ThermoFisher QuantStudio 12K Flex Real Time PCR System instrument with QuantStudio 12K Flex Software or Taqman Genotyper Software v1.3.

## **Reference test methods**

### **Research post-mortem**

The cerebral hemispheres were sectioned in the coronal plane at 1cm intervals, the first slice taken through the mammillary bodies. The cerebellum was sectioned in the sagittal plane and the brainstem axially. Tissue samples approximately 20x20x10mm were taken from each cerebral hemisphere from: frontal parasagittal cortex (BA9); Broca's area (BA44/45); temporal tip (BA38); caudate nucleus; basal ganglia; hippocampus; thalamus; frontal, temporal, parietal and occipital white matter; cerebellum; pons and medulla. Samples were bisected in the coronal plane, one block fixed in 10% unbuffered formalin for standard histological processing and the other frozen in nitrogen vapour.<sup>5,6</sup>

### **SVD assessment**

We detected CAA in all cerebral and cerebellar lobes using immunohistochemistry with a monoclonal mouse antibody to human beta-amyloid, (Clone 6F/3D, Dako, Copenhagen) at a concentration of 1:100.

**Example images of small vessel disease histopathological assessment grading**

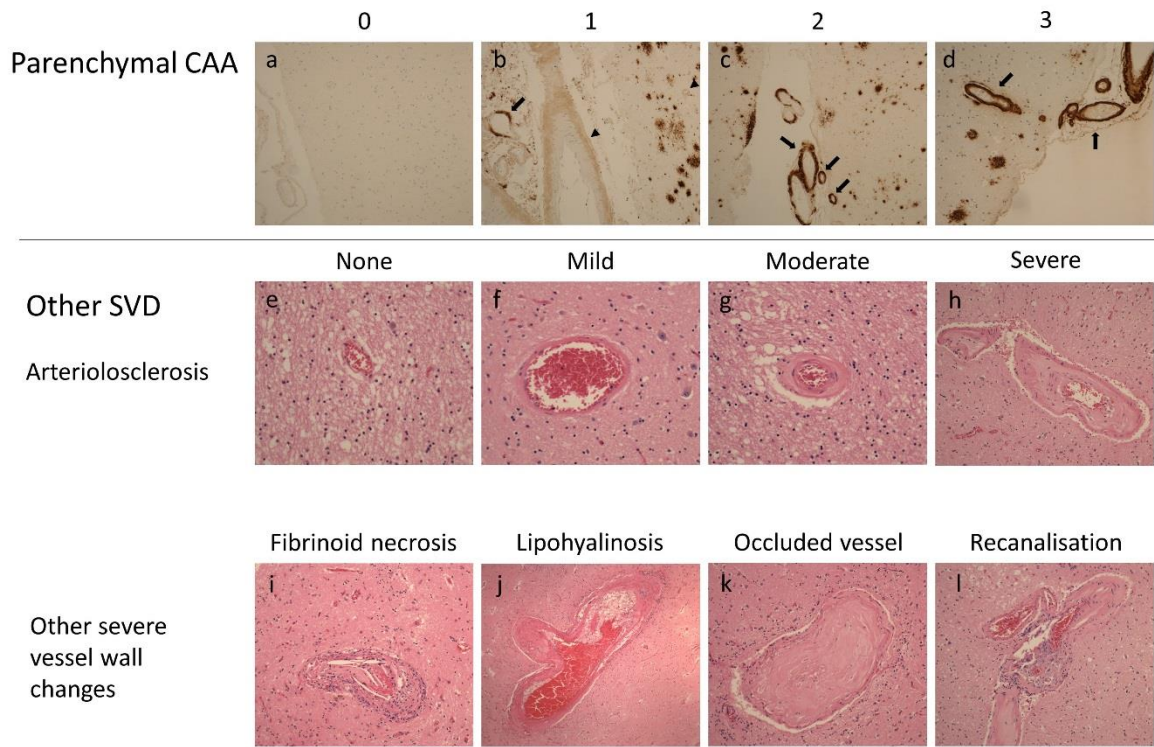

**Flowchart of participants through the study**

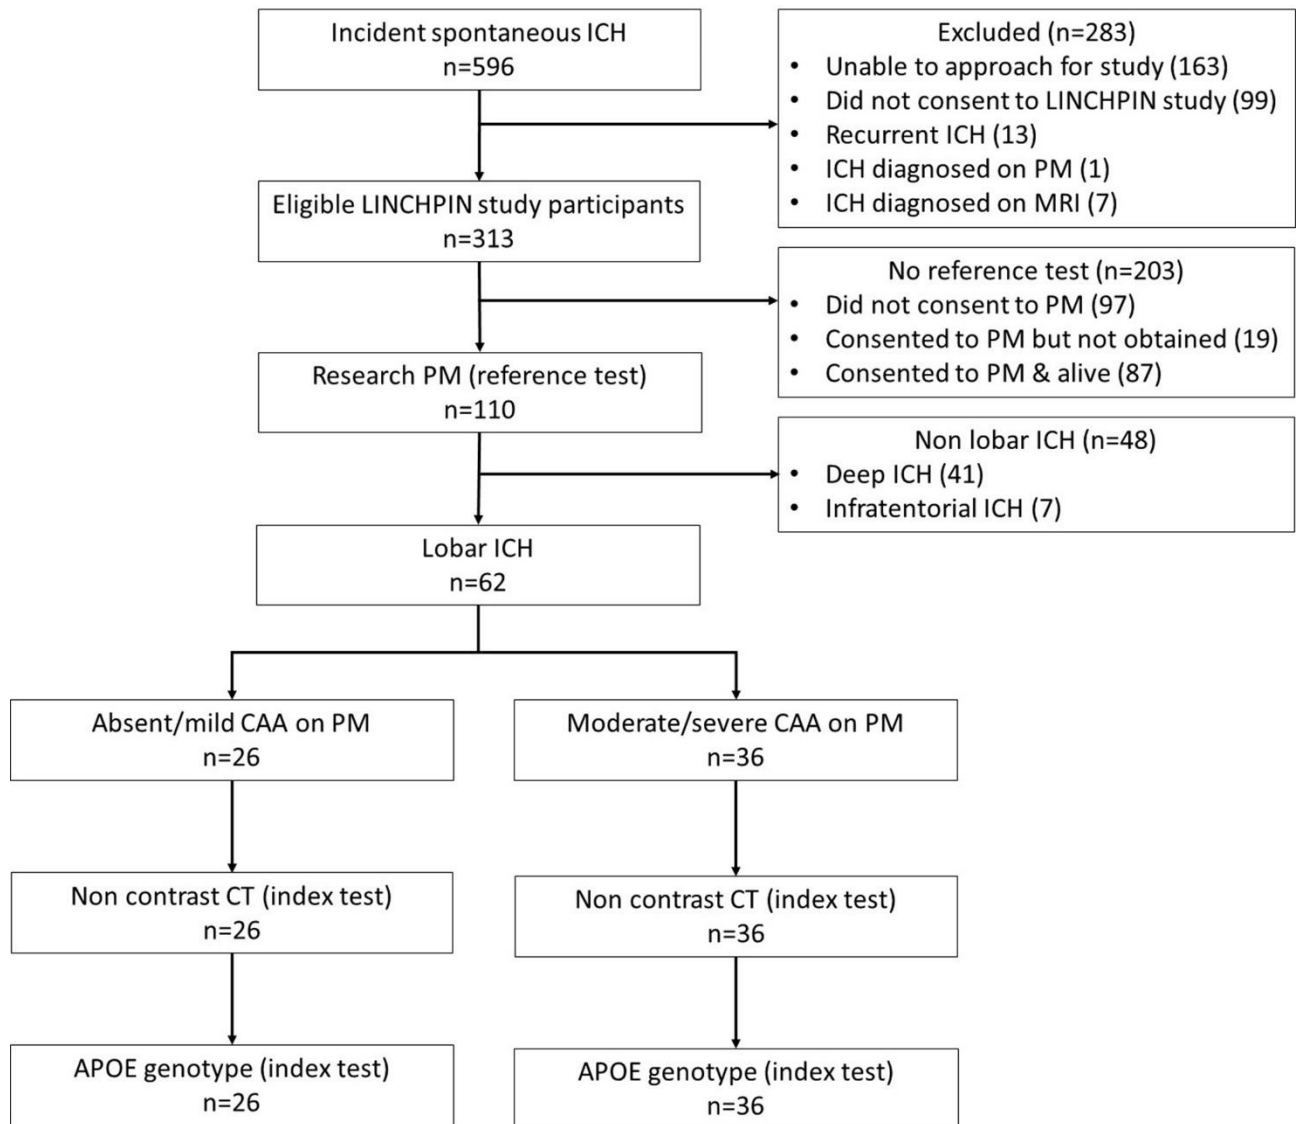

APOE = apolipoprotein. CAA = cerebral amyloid angiopathy. CT = computed tomography. ICH = intracerebral haemorrhage. LINCHPIN study = Lothian IntraCerebral Haemorrhage, Pathology, Imaging and Neurological Outcome study. MRI = magnetic resonance imaging. PM = research post-mortem.

## Baseline characteristics of participants with lobar ICH who underwent post mortem versus those who did not

| Characteristic                           | Post mortem<br>(n=62) | No post mortem<br>(n=86) | p value  |
|------------------------------------------|-----------------------|--------------------------|----------|
| <b>Median age, years</b>                 | 83 (78-86)            | 78 (69-81)               | 0.00005  |
| <b>Male</b>                              | 23 (37)               | 36 (42)                  | 0.56     |
| <b>Hypertension</b>                      | 42 (68)               | 45 (52)                  | 0.06     |
| <b>Antiplatelet use at ICH</b>           | 33 (53)               | 35 (41)                  | 0.15     |
| <b>Anticoagulant use at ICH</b>          | 9 (15)                | 14 (16)                  | 0.75     |
| <b>Dementia</b>                          | 10 (16)               | 5 (6)                    | 0.05     |
| <b>APOE ε2+</b>                          | 14 (23)               | 20 (33) ‡                | 0.19     |
| <b>APOE ε4+</b>                          | 20 (32)               | 25 (42) ‡                | 0.28     |
| <b>Multiple ICH</b>                      | 9 (15)                | 5 (6)                    | 0.23     |
| <b>Left side</b>                         | 32 (52)               | 47 (55)                  | 0.71     |
| <b>ICH location*</b>                     |                       |                          |          |
| • Frontal                                | 29 (47)               | 36 (42)                  |          |
| • Parietal                               | 14 (23)               | 23 (27)                  | 0.91     |
| • Temporal                               | 10 (16)               | 13 (15)                  |          |
| • Occipital                              | 9 (15)                | 14 (16)                  |          |
| <b>Median ICH volume, cm<sup>3</sup></b> | 60 (20-118)           | 20 (11-32)               | 0.000002 |
| <b>Strictly lobar ICH</b>                | 58 (94)               | 85 (99)                  | 0.16†    |
| <b>IV extension</b>                      | 31 (50)               | 17 (20)                  | 0.0001   |
| <b>Any SAH</b>                           | 43 (69)               | 58 (67)                  | 0.81     |
| <b>Subdural extension</b>                | 12 (19)               | 14 (16)                  | 0.63     |
| <b>Midline shift</b>                     | 39 (63)               | 36 (42)                  | 0.01     |
| <b>Finger-like projections</b>           | 14 (23)               | 23 (27)                  | 0.56     |
| <b>Cortical involvement</b>              | 56 (90)               | 74 (86)                  | 0.43     |
| <b>Dilute/seeping</b>                    | 24 (39)               | 36 (42)                  | 0.70     |
| <b>Old vascular lesion</b>               | 23 (37)               | 29 (34)                  | 0.67     |
| <b>Anterior WML</b>                      |                       |                          |          |
| 0                                        | 10 (16)               | 22 (26)                  |          |
| 1                                        | 37 (60)               | 48 (56)                  | 0.35     |
| 2                                        | 15 (24)               | 16 (19)                  |          |
| <b>Posterior WML</b>                     |                       |                          |          |
| 0                                        | 13 (21)               | 34 (40)                  |          |
| 1                                        | 9 (14)                | 21 (24)                  | 0.003    |
| 2                                        | 40 (65)               | 31 (36)                  |          |
| <b>Central atrophy</b>                   |                       |                          |          |
| 0                                        | 19 (31)               | 34 (40)                  |          |
| 1                                        | 39 (63)               | 49 (57)                  | 0.46†    |
| 2                                        | 4 (6)                 | 3 (3)                    |          |
| <b>Cortical atrophy</b>                  |                       |                          |          |
| 0                                        | 15 (24)               | 24 (28)                  |          |
| 1                                        | 33 (53)               | 46 (53)                  | 0.79     |
| 2                                        | 14 (23)               | 16 (19)                  |          |
| <b>CT CAA category</b>                   |                       |                          |          |
| High                                     | 14 (23)               | 23 (27)                  |          |
| Intermediate                             | 29 (47)               | 35 (41)                  | 0.74     |
| Low                                      | 19 (31)               | 28 (33)                  |          |
| <b>CT &amp; APOE CAA category</b>        |                       |                          |          |
| High                                     | 24 (39)               | 23 (38)                  |          |
| Intermediate                             | 24 (39)               | 21 (35)                  | 0.85     |
| Low                                      | 14 (23)               | 16 (27)                  |          |

Data are number (%) or median (IQR). AF = atrial fibrillation. APOE ε2+ = apolipoprotein E ε2 allele present. APOE ε4+ = apolipoprotein E ε4 allele present. CAA = cerebral amyloid angiopathy. CT = computed tomography. ICH = intracerebral haemorrhage. SAH = subarachnoid haemorrhage. TIA = transient ischaemic attack. WML = white matter lucencies. \* = presumed epicentre of haematoma defined by CHARTS. † = Fisher's exact test. ‡ 22 cases excluded as no APOE genotype

### Intra- and inter-observer agreement for computed tomography features.

| Characteristic                                     | Frequency, n (%)<br>(n=110) | Intra-observer agreement<br>(95%CI) (n=110) | Inter-observer agreement<br>(95%CI) (n=110) |
|----------------------------------------------------|-----------------------------|---------------------------------------------|---------------------------------------------|
| <b>Multiple ICH</b>                                | 12 (11)                     | 1.00 (1.00-1.00)                            | 0.64 (0.43-0.86)                            |
| <b>ICH side</b>                                    |                             |                                             |                                             |
| Left                                               | 55 (50)                     |                                             |                                             |
| Right                                              | 51 (46)                     | 1.00 (1.00-1.00)                            | 1.00 (1.00-1.00)                            |
| Central                                            | 4 (4)                       |                                             |                                             |
| <b>Median ICH volume,<br/>cm<sup>3</sup> (IQR)</b> | 31 (13-82)                  | 0.98* (0.98-0.99)                           | 0.96* (0.91-0.98)                           |
| <b>Supratentorial strictly<br/>lobar ICH</b>       | 58 (53)                     | 0.98 (0.95-1.00)                            | 0.42 (0.28-0.56)                            |
| <b>IV extension</b>                                | 67 (61)                     | 1.00 (1.00-1.00)                            | 0.73 (0.60-0.86)                            |
| <b>Any SAH</b>                                     | 51 (46)                     | 0.98 (0.95-1.00)                            | 0.71 (0.58-0.84)                            |
| <b>Subdural extension</b>                          | 12 (11)                     | 0.96 (0.87-1.00)                            | 0.59 (0.35-0.83)                            |
| <b>Midline shift</b>                               | 66 (60)                     | 0.75 (0.62-0.88)                            | 0.61 (0.48-0.75)                            |
| <b>Blood/fluid level</b>                           | 8 (7)                       | 0.70 (0.41-0.98)                            | 0.27 (-0.07-0.60)                           |
| <b>Irregular/lobulated</b>                         | 69 (63)                     | 0.68 (0.54-0.82)                            | 0.13 (0.02-0.25)                            |
| <b>Finger-like projections</b>                     | 16 (15)                     | 0.72 (0.53-0.92)                            | 0.60 (0.36-0.83)                            |
| <b>Round/oval</b>                                  | 36 (33)                     | 0.72 (0.58-0.86)                            | 0.05 (0.00-0.09)                            |
| <b>Cortical involvement</b>                        | 60 (55)                     | 0.98 (0.95-1.00)                            | 0.80 (0.68-0.91)                            |
| <b>Dilute/seeping</b>                              | 29 (26)                     | 0.88 (0.78-0.98)                            | 0.57 (0.39-0.75)                            |
| <b>Old vascular lesion</b>                         | 48 (44)                     | 0.95 (0.88-1.00)                            | 0.56 (0.41-0.72)                            |
| <b>Anterior WML</b>                                |                             |                                             |                                             |
| 0                                                  | 14 (13)                     |                                             |                                             |
| 1                                                  | 66 (60)                     | 0.76† (0.65-0.88)                           | 0.54† (0.40-0.67)                           |
| 2                                                  | 30 (27)                     |                                             |                                             |
| <b>Posterior WML</b>                               |                             |                                             |                                             |
| 0                                                  | 27 (25)                     |                                             |                                             |
| 1                                                  | 20 (18)                     | 0.75† (0.66-0.84)                           | 0.52† (0.40-0.64)                           |
| 2                                                  | 63 (57)                     |                                             |                                             |
| <b>Central atrophy</b>                             |                             |                                             |                                             |
| 0                                                  | 24 (22)                     |                                             |                                             |
| 1                                                  | 66 (60)                     | 0.70† (0.58-0.82)                           | 0.51† (0.37-0.64)                           |
| 2                                                  | 20 (18)                     |                                             |                                             |
| <b>Cortical atrophy</b>                            |                             |                                             |                                             |
| 0                                                  | 19 (17)                     |                                             |                                             |
| 1                                                  | 64 (58)                     | 0.65† (0.53-0.78)                           | 0.55† (0.41-0.69)                           |
| 2                                                  | 27 (25)                     |                                             |                                             |

Agreement assessed with un-weighted Cohen's kappa, linear-weighted kappa<sup>†</sup>, or intraclass correlation coefficient\*. ICH = intracerebral haemorrhage. Cohen suggested the Kappa result be interpreted as follows: values  $\leq 0$  as indicating no agreement and 0.01–0.20 as none to slight, 0.21–0.40 as fair, 0.41–0.60 as moderate, 0.61–0.80 as substantial, and 0.81–1.00 as almost perfect agreement. IV = intraventricular. SAH = subarachnoid haemorrhage. WML = white matter lesion.

## Baseline characteristics of all ICH, stratified by location

|                                          | All ICH<br>(n=110) | Lobar ICH<br>(n=62) | Non-lobar ICH (n=48) |
|------------------------------------------|--------------------|---------------------|----------------------|
| Median age at ICH, years                 | 83 (76-87)         | 83 (78-86)          | 82 (75-87)           |
| Male                                     | 49 (45)            | 23 (37)             | 26 (54)              |
| Median time from ICH to CT, hours        | 5 (3-18)           | 6 (3-29)            | 4 (3-15)             |
| Median time from CT to post-mortem, days | 11 (5-80)          | 11 (6-134)          | 9 (5-23)             |
| Previous ischaemic stroke/TIA            | 23 (21)            | 12 (19)             | 11 (23)              |
| Coronary artery disease                  | 25 (23)            | 16 (26)             | 9 (19)               |
| Atrial fibrillation                      | 31 (28)            | 19 (31)             | 12 (25)              |
| Diabetes                                 | 14 (13)            | 6 (10)              | 8 (17)               |
| Hypertension                             | 77 (70)            | 42 (68)             | 35 (73)              |
| Hyperlipidaemia                          | 15 (14)            | 8 (13)              | 7 (15)               |
| Antiplatelet use at ICH                  | 53 (48)            | 33 (53)             | 20 (42)              |
| Anticoagulant use at ICH                 | 20 (18)            | 9 (15)              | 11 (23)              |
| Dementia before ICH                      | 18 (16)            | 10 (16)             | 8 (17)               |
| APOE ε2+                                 | 21 (19)            | 14 (23)             | 7 (15)               |
| APOE ε4+                                 | 34 (31)            | 20 (32)             | 14 (29)              |
| <b>ICH location*</b>                     |                    |                     |                      |
| • Lobar                                  | 62 (56)            | 62 (100)            |                      |
| ○ Frontal                                | 29 (26)            | 29 (47)             |                      |
| ○ Parietal                               | 14 (13)            | 14 (23)             |                      |
| ○ Temporal                               | 10 (9)             | 10 (16)             |                      |
| ○ Occipital                              | 9 (8)              | 9 (15)              |                      |
| • Deep                                   | 41 (37)            |                     | 41 (85)              |
| ○ Basal ganglia                          | 22 (20)            |                     | 22 (46)              |
| ○ Thalamic                               | 19 (17)            |                     | 19 (40)              |
| • Infratentorial                         | 7 (6)              |                     | 7 (15)               |
| ○ Brainstem                              | 4 (4)              |                     | 4 (8)                |
| ○ Cerebellum                             | 3 (3)              |                     | 3 (6)                |

Data are number (%) or median (IQR). AF = atrial fibrillation. APOE ε2+ = apolipoprotein E ε2. allele present. APOE ε4+ = apolipoprotein E ε4 allele present. CT = computed tomography. ICH = intracerebral haemorrhage. TIA = transient ischaemic attack. \* = presumed epicentre of haematoma defined by CHARTS<sup>4</sup>

**Distribution of cerebral small vessel disease sub-types by ICH location**

|                                      | <b>Non-lobar ICH (n=48)</b> |                                | <b>Lobar ICH (n=62)</b>    |                                |
|--------------------------------------|-----------------------------|--------------------------------|----------------------------|--------------------------------|
| <b>Pathology Category</b>            | <i>CAA<br/>absent</i>       | <i>CAA<br/>present</i>         | <i>CAA<br/>absent</i>      | <i>CAA<br/>present</i>         |
| <i>Other SVD absent</i>              | 0 (0)                       | 0 (0)                          | 0 (0)                      | 0 (0)                          |
| <i>Other SVD present</i>             | 32 (67)                     | 16 (33)                        | 16 (26)                    | 46 (74)                        |
| <b>Pathology Category</b>            |                             |                                |                            |                                |
|                                      | <i>CAA<br/>absent/mild</i>  | <i>CAA<br/>moderate/severe</i> | <i>CAA<br/>absent/mild</i> | <i>CAA<br/>moderate/severe</i> |
| <i>Other SVD absent/mild</i>         | 0 (0)                       | 0 (0)                          | 2 (3)                      | 10 (16)                        |
| <i>Other SVD<br/>moderate/severe</i> | 42 (88)                     | 6 (13)                         | 24 (39)                    | 26 (42)                        |

Data are number (%). CAA = cerebral amyloid angiopathy. ICH = intracerebral haemorrhage. SVD = small vessel disease



**Logistic regression model with Firth correction fitted in participants with lobar ICH associated with moderate/severe CAA, excluding 9 cases taking oral anticoagulants at the time of ICH**

|                                 | <b>β Coefficient (standard error)</b> | <b>Odds ratio (95%CI)</b> | <b>p value</b> |
|---------------------------------|---------------------------------------|---------------------------|----------------|
| <b>Intercept</b>                | -2.43 (0.92)                          |                           | 0.009          |
| <b>APOE ε4 +</b>                | 2.77 (1.00)                           | 15.97 (2.93-587.82)       | 0.006          |
| <b>Subarachnoid haemorrhage</b> | 2.18 (0.97)                           | 8.89 (1.69-277.39)        | 0.02           |
| <b>Finger-like projections</b>  | 3.09 (1.60)                           | 21.97 (2.19-∞)            | 0.05           |

APOE ε4+ = apolipoprotein E ε4 allele present.

**Performance measures of the diagnostic prediction model in the development dataset (n=62) and following internal validation using the same dataset (n=62; 2,000 bootstrap samples)**

|                              | Development               | Internal validation       |
|------------------------------|---------------------------|---------------------------|
| <b>Overall</b>               |                           |                           |
| Brier score                  | 0.11                      | 0.12                      |
| R <sup>2</sup> (Nagelkerke)  | 0.57                      | 0.51                      |
| Akaike information criterion | 49.90                     | 55.90                     |
| <b>Discrimination</b>        |                           |                           |
| c statistic                  | 0.92                      | 0.91                      |
| Discrimination slope         | 0.52                      | 0.50                      |
| <b>Calibration</b>           |                           |                           |
| Hosmer-Lemeshow test         | $\chi^2 = 0.55, p = 0.76$ | $\chi^2 = 2.79, p = 0.25$ |

**Predicted and observed frequencies, and categorisation of the probability of lobar ICH associated with moderate/severe CAA according to the three predictor variables**

| Predictors present       |          |                         | Predicted risk of moderate/severe CAA, % | Observed frequency of moderate/severe CAA |       |           | Moderate/severe CAA probability |
|--------------------------|----------|-------------------------|------------------------------------------|-------------------------------------------|-------|-----------|---------------------------------|
| Subarachnoid haemorrhage | APOE ε4+ | Finger-like projections |                                          | (% [95%CI])                               |       |           |                                 |
| -                        | -        | -                       | 7                                        | 0/14                                      | (0)   | [0-22%]   | <b>Low</b>                      |
| +                        | -        | -                       | 44                                       | 9/19                                      | (47)  | [27-68%]  | <b>Medium</b>                   |
| -                        | +        | -                       | 64                                       | 4/5                                       | (80)  | [38-99%]  |                                 |
| +                        | +        | -                       | 95                                       | 9/10                                      | (90)  | [60-99%]  | <b>High</b>                     |
| +                        | -        | +                       | 95                                       | 9/9                                       | (100) | [70-100%] |                                 |
| +                        | +        | +                       | 100                                      | 5/5                                       | (100) | [57-100%] |                                 |

**Cross tabulations of the Edinburgh CT and genetic diagnostic criteria for lobar ICH associated with moderate/severe CAA against the reference standard**

| Diagnostic criteria (index test)     | Reference standard                 |        |       |
|--------------------------------------|------------------------------------|--------|-------|
|                                      | Moderate/severe CAA at post-mortem |        |       |
|                                      | Present                            | Absent | Total |
| Subarachnoid haemorrhage or APOE ε4+ |                                    |        |       |
| Positive                             | 36                                 | 12     | 48    |
| Negative                             | 0                                  | 14     | 14    |
| Total                                | 36                                 | 26     | 62    |

| Diagnostic criteria (index test)                                   | Reference standard                 |        |       |
|--------------------------------------------------------------------|------------------------------------|--------|-------|
|                                                                    | Moderate/severe CAA at post-mortem |        |       |
|                                                                    | Present                            | Absent | Total |
| Subarachnoid haemorrhage and (APOE ε4+ or finger-like projections) |                                    |        |       |
| Positive                                                           | 23                                 | 1      | 24    |
| Negative                                                           | 13                                 | 25     | 38    |
| Total                                                              | 36                                 | 26     | 62    |

APOE = apolipoprotein. CAA = cerebral amyloid angiopathy. CT = computed tomography.

**Diagnostic test accuracy statistics for the two sets of Edinburgh CT and genetic diagnostic criteria for lobar ICH associated with moderate/severe CAA**

|                                  | Edinburgh CT and genetic diagnostic criteria |                                                                    |
|----------------------------------|----------------------------------------------|--------------------------------------------------------------------|
|                                  | Subarachnoid haemorrhage or APOE ε4+         | Subarachnoid haemorrhage and (APOE ε4+ or finger-like projections) |
| <b>Sensitivity</b>               | 100 (88-100)                                 | 64 (46-79)                                                         |
| <b>Specificity</b>               | 54 (34-73)                                   | 96 (78-100)                                                        |
| <b>Positive likelihood ratio</b> | 2.2 (1.4-3.3)                                | 16.6 (2.4-115.3)                                                   |
| <b>Negative likelihood ratio</b> | 0 (0-NaN)                                    | 0.4 (0.2-0.6)                                                      |
| <b>Positive predictive value</b> | 75 (60-86)                                   | 96 (77-100)                                                        |
| <b>Negative predictive value</b> | 100 (73-100)                                 | 66 (49-80)                                                         |
| <b>Youden's Index</b>            | 0.54                                         | 0.60                                                               |

Data are percentage or ratio (95% confidence interval). APOE = apolipoprotein. CAA = cerebral amyloid angiopathy. CT = computed tomography. NaN = not a number – calculation cannot be performed because one of the values includes a zero

**Decision curves of predictions and classifications of moderate/severe CAA in participants with lobar ICH using fixed cut-off points from the CT and APOE genotype prediction model to assign patients as positive or negative for moderate/severe CAA.**

The threshold probability is the level of diagnostic certainty above which a patient or clinician would choose to be treated. Equally, it could be used by a researcher to identify patients eligible for inclusion in a randomised controlled trial or identify cases and controls for a case-control study. The threshold probability is low in situations where we want to avoid false negatives (e.g. when trying to rule out CAA-associated lobar ICH) and high when false positives are to be avoided (e.g. when trying to rule in CAA-associated lobar ICH). Net benefit is the difference between those expected to benefit (true positives identified using the strategy – expected benefit) and those expected to be harmed (false positives identified using the strategy multiplied by a weighting factor based on the threshold probability – expected harm). The curves which maximise net benefit represent the optimal strategy for the associated threshold probabilities. The solid black line indicates a policy of treating no one, the grey line a policy of treating all.

The combination of subarachnoid haemorrhage or APOE $\epsilon$ 4 is the best diagnostic strategy for low threshold probabilities (0-0.55), where harm of unnecessary treatment is limited and false negatives avoided (i.e. useful for ruling CAA-associated lobar ICH out). For high threshold probabilities (0.55-0.90), where there is harm of overtreatment and false positives should be avoided, the criteria of subarachnoid haemorrhage AND (APOE  $\epsilon$ 4 OR Finger-like projections) maximises net benefit (i.e. for ruling CAA-associated lobar ICH in).

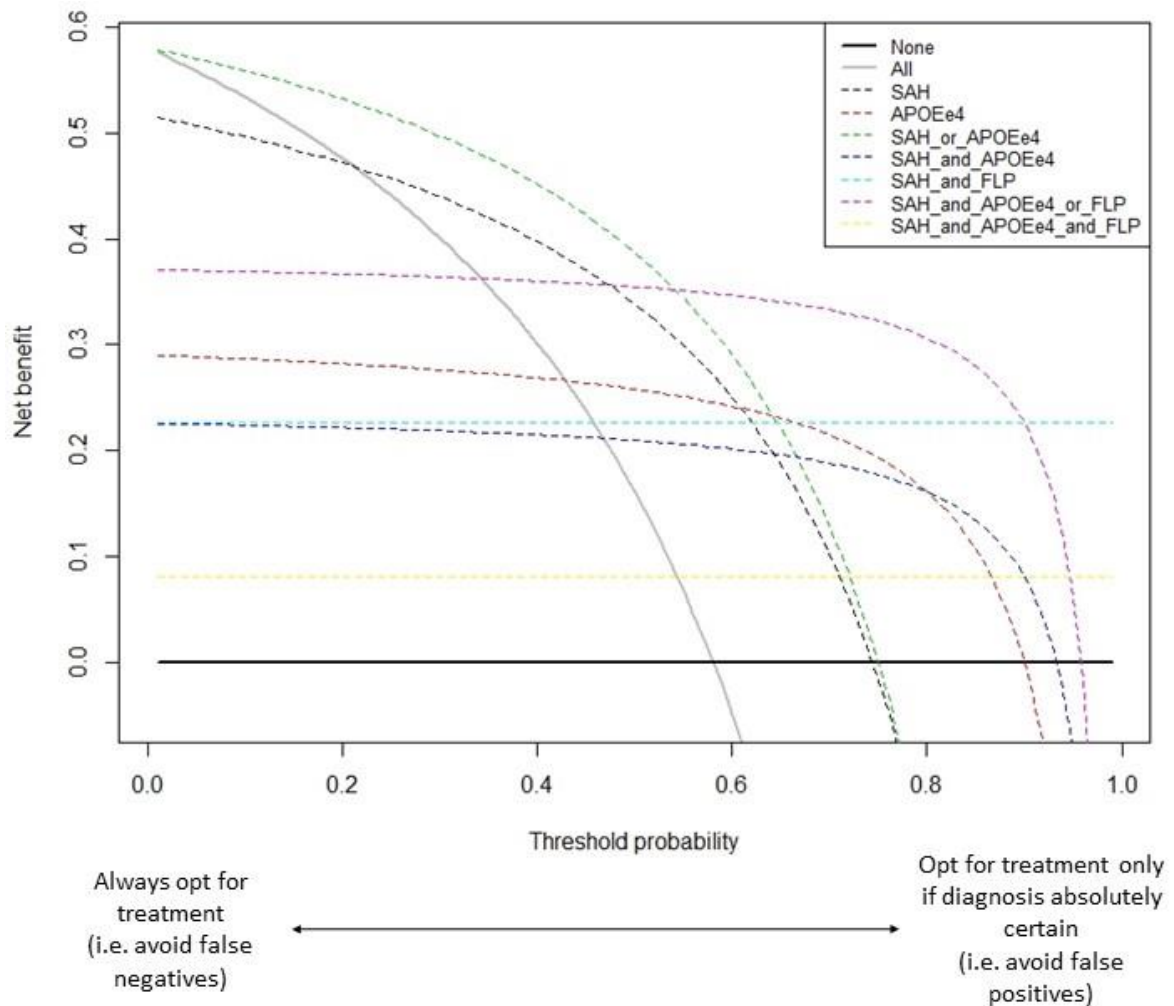

APOE  $\epsilon$ 4 = apolipoprotein E  $\epsilon$ 4 allele present. FLP = finger-like projection. SAH = subarachnoid haemorrhage

**Logistic regression model using PMW ratings for CT-based features and APOE genotype, with Firth correction fitted in participants with lobar ICH associated with moderate/severe CAA.**

|                                 | <b>β Coefficient (standard error)</b> | <b>Odds ratio (95%CI)</b> | <b>p value</b> |
|---------------------------------|---------------------------------------|---------------------------|----------------|
| <b>Intercept</b>                | -3.39 (1.46)                          |                           | 0.02           |
| <b>APOE ε4 +</b>                | 4.18 (1.49)                           | 65 (7-∞)                  | 0.005          |
| <b>Subarachnoid haemorrhage</b> | 3.09 (1.47)                           | 22 (3-∞)                  | 0.04           |
| <b>Finger-like projections</b>  | 3.01 (1.61)                           | 20 (2-∞)                  | 0.06           |

APOE ε4+ = apolipoprotein E ε4 allele present.

This model calculates the predicted probability of moderate/severe CAA as follows:

$$\text{Predicted probability} = 1/(1 + \exp^{-\text{risk score}})$$

$$\text{Risk score} = -3.39 + 4.18 \times (\text{APOE}\epsilon 4+) + 3.09 \times (\text{subarachnoid haemorrhage}) + 3.01 \times (\text{finger-like projections})$$

The predictor values are one when present and zero when absent.

### Discrimination and calibration measures of CT and APOE diagnostic prediction model performance using PMW CT ratings

A. Receiver operating characteristic (ROC) curve for predicted probability of moderate/severe CAA. The area under the curve (AUC) is equivalent to the c statistic. The shaded area represents the 95% confidence interval of the AUC based on 2,000 bootstrap replicates. The dotted line indicates a non-informative AUC of 0.50 for comparison. B. Calibration plot of predicted probability versus observed frequency of moderate/severe CAA. The grey line indicates perfect calibration, the model's calibration is shown by the dotted line. The triangles represent the six different moderate or severe CAA risk groups produced by the prediction model. The vertical lines along the x axis represent the frequency and distribution of model predicted probabilities.

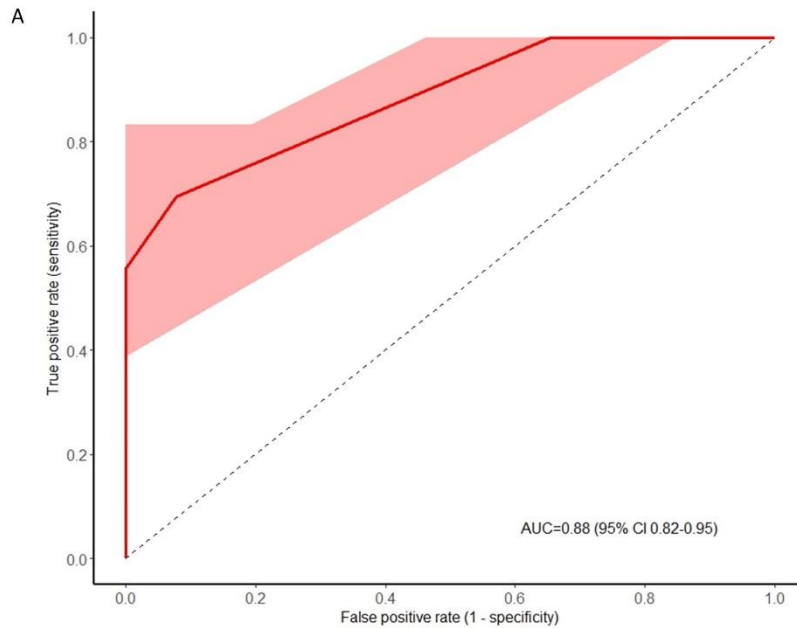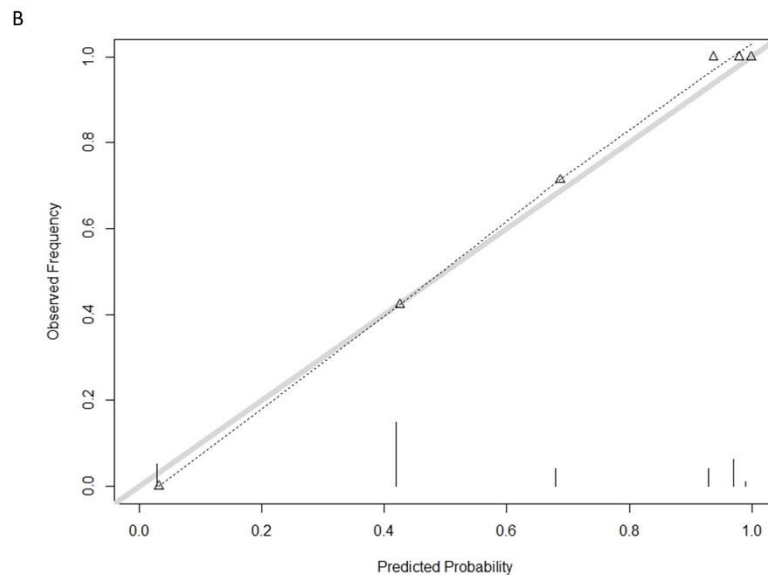



**Performance measures of CT and APOE diagnostic prediction model using PMW CT ratings in the development dataset (n = 62) and following internal validation using the same dataset (n = 62; 2,000 bootstrap samples).**

|                              | Development               | Internal validation       |
|------------------------------|---------------------------|---------------------------|
| <b>Overall</b>               |                           |                           |
| Brier score                  | 0.13                      | 0.14                      |
| R <sup>2</sup> (Nagelkerke)  | 0.51                      | 0.47                      |
| Akaike information criterion | 53.78                     | 57.86                     |
| <b>Discrimination</b>        |                           |                           |
| c statistic                  | 0.88                      | 0.88                      |
| Discrimination slope         | 0.45                      | 0.43                      |
| <b>Calibration</b>           |                           |                           |
| Hosmer-Lemeshow test         | $\chi^2 = 0.74, p = 0.86$ | $\chi^2 = 2.01, p = 0.37$ |

**Risk categories for lobar ICH associated with moderate/severe CAA using CT and APOE diagnostic criteria using PMW CT ratings**

| Predictors present       |          |                         | Predicted risk of moderate/severe CAA, % | Observed frequency of moderate/severe CAA (%) [95%CI] |       |           | Moderate/ severe CAA probability |
|--------------------------|----------|-------------------------|------------------------------------------|-------------------------------------------------------|-------|-----------|----------------------------------|
| Subarachnoid haemorrhage | APOE ε4+ | Finger-like projections |                                          |                                                       |       |           |                                  |
| -                        | -        | -                       | 3                                        | 0/9                                                   | (0)   | [0-30%]   | Low                              |
| +                        | -        | -                       | 43                                       | 11/26                                                 | (42)  | [26-61%]  |                                  |
| -                        | +        | -                       | 69                                       | 5/7                                                   | (71)  | [36-92%]  | Medium                           |
| +                        | +        | -                       | 98                                       | 11/11                                                 | (100) | [74-100%] |                                  |
| +                        | -        | +                       | 94                                       | 7/7                                                   | (100) | [65-100%] | High                             |
| +                        | +        | +                       | 100                                      | 2/2                                                   | (100) | [34-100%] |                                  |

APOE ε4+ = apolipoprotein E ε4 allele present. CAA = cerebral amyloid angiopathy

**Cross tabulations of the Edinburgh CT and genetic diagnostic criteria for lobar ICH associated with moderate/severe CAA using PMW CT ratings against the reference standard**

| <b>Diagnostic criteria (index test)</b>     | <b>Reference standard</b>                 |        |       |
|---------------------------------------------|-------------------------------------------|--------|-------|
|                                             | <b>Moderate/severe CAA at post-mortem</b> |        |       |
| <b>Subarachnoid haemorrhage or APOE ε4+</b> | Present                                   | Absent | Total |
| Positive                                    | 36                                        | 17     | 53    |
| Negative                                    | 0                                         | 9      | 9     |
| Total                                       | 36                                        | 26     | 62    |

  

| <b>Diagnostic criteria (index test)</b>                                   | <b>Reference standard</b>                 |        |       |
|---------------------------------------------------------------------------|-------------------------------------------|--------|-------|
|                                                                           | <b>Moderate/severe CAA at post-mortem</b> |        |       |
| <b>Subarachnoid haemorrhage and (APOE ε4+ or finger-like projections)</b> | Present                                   | Absent | Total |
| Positive                                                                  | 20                                        | 0      | 20    |
| Negative                                                                  | 16                                        | 26     | 42    |
| Total                                                                     | 36                                        | 26     | 62    |

APOE ε4+ = apolipoprotein E ε4 allele present. CAA = cerebral amyloid angiopathy

**Diagnostic test accuracy statistics for the Edinburgh CT and genetic diagnostic criteria for lobar ICH associated with moderate/severe CAA using PMW CT ratings**

|                                  | Edinburgh CT and genetic diagnostic criteria |                                                                    |
|----------------------------------|----------------------------------------------|--------------------------------------------------------------------|
|                                  | Subarachnoid haemorrhage or APOE ε4+         | Subarachnoid haemorrhage and (APOE ε4+ or finger-like projections) |
| <b>Sensitivity</b>               | 100 (88-100)                                 | 56 (38-72)                                                         |
| <b>Specificity</b>               | 35 (18-56)                                   | 100 (84-100)                                                       |
| <b>Positive likelihood ratio</b> | 1.5 (1.2-2.0)                                | ∞ (NaN-∞)                                                          |
| <b>Negative likelihood ratio</b> | 0 (0-NaN)                                    | 0.4 (0.3-0.6)                                                      |
| <b>Positive predictive value</b> | 68 (54-80)                                   | 100 (80-100)                                                       |
| <b>Negative predictive value</b> | 100 (63-100)                                 | 62 (46-76)                                                         |
| <b>Youden's Index</b>            | 0.35                                         | 0.56                                                               |

Data are percentage or ratio (95% confidence interval). NaN = not a number – calculation cannot be performed because one of the values includes a zero.

**Comparison of the Edinburgh CT and genetic criteria with the modified Boston criteria in participants with lobar ICH who underwent MRI during life**

| <b>Age at ICH</b> | <b>Modified Boston MRI classification</b> | <b>Edinburgh CT and genetic classification</b> | <b>Pathological CAA grade</b> |
|-------------------|-------------------------------------------|------------------------------------------------|-------------------------------|
| 79                | Probable                                  | High                                           | Severe                        |
| 76                | Probable                                  | High                                           | Moderate                      |
| 72                | Probable                                  | High                                           | Moderate                      |
| 84                | Probable                                  | Intermediate                                   | Severe                        |
| 90                | Probable                                  | Intermediate                                   | Mild                          |
| 83                | Probable                                  | Intermediate                                   | Absent                        |
| 83                | Probable                                  | Low                                            | Absent                        |

**Logistic regression model using only CT-based features without APOE genotype, with Firth correction fitted in participants with lobar ICH associated with moderate/severe CAA.**

|                                 | $\beta$ Coefficient (standard error) | Odds ratio (95%CI)      | p value |
|---------------------------------|--------------------------------------|-------------------------|---------|
| <b>Intercept</b>                | -1.24 (0.55)                         |                         | 0.02    |
| <b>Subarachnoid haemorrhage</b> | 1.71 (0.67)                          | 5.54 (1.63-26.09)       | 0.01    |
| <b>Finger-like projections</b>  | 2.89 (1.54)                          | 18.03 (2.04- $\infty$ ) | 0.06    |

This model calculates the predicted probability of moderate/severe CAA as follows:

$$\text{Predicted probability} = 1/(1 + \exp^{-\text{risk score}})$$

$$\text{Risk score} = -1.24 + 1.71 \times (\text{subarachnoid haemorrhage}) + 2.89 \times (\text{finger-like projections})$$

The predictor values are one when present and zero when absent.

### Discrimination and calibration measures of CT-based diagnostic prediction model without APOE genotype

A. Receiver operating characteristic (ROC) curve for predicted probability of moderate/severe CAA. The area under the curve (AUC) is equivalent to the c statistic. The shaded area represents the 95% confidence interval of the AUC based on 2,000 bootstrap replicates. The dotted line indicates a non-informative AUC of 0.50 for comparison. B. Calibration plot of predicted probability versus observed frequency of moderate/severe CAA. The grey line indicates perfect calibration, the model's calibration is shown by the dotted line. The triangles represent the three different moderate or severe CAA risk groups produced by the prediction model. The vertical lines along the x axis represent the frequency and distribution of model predicted probabilities.

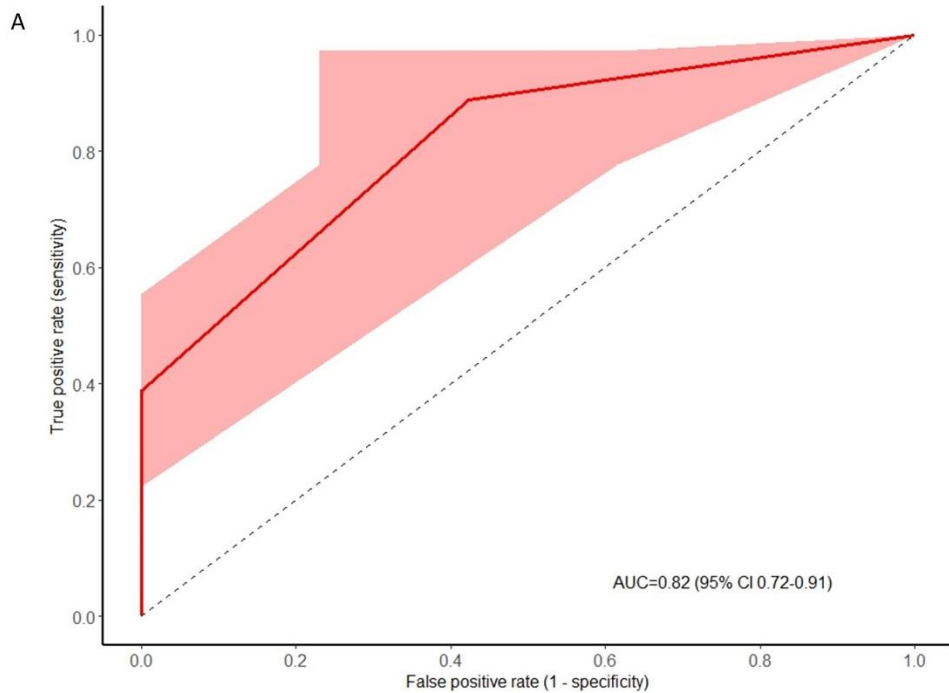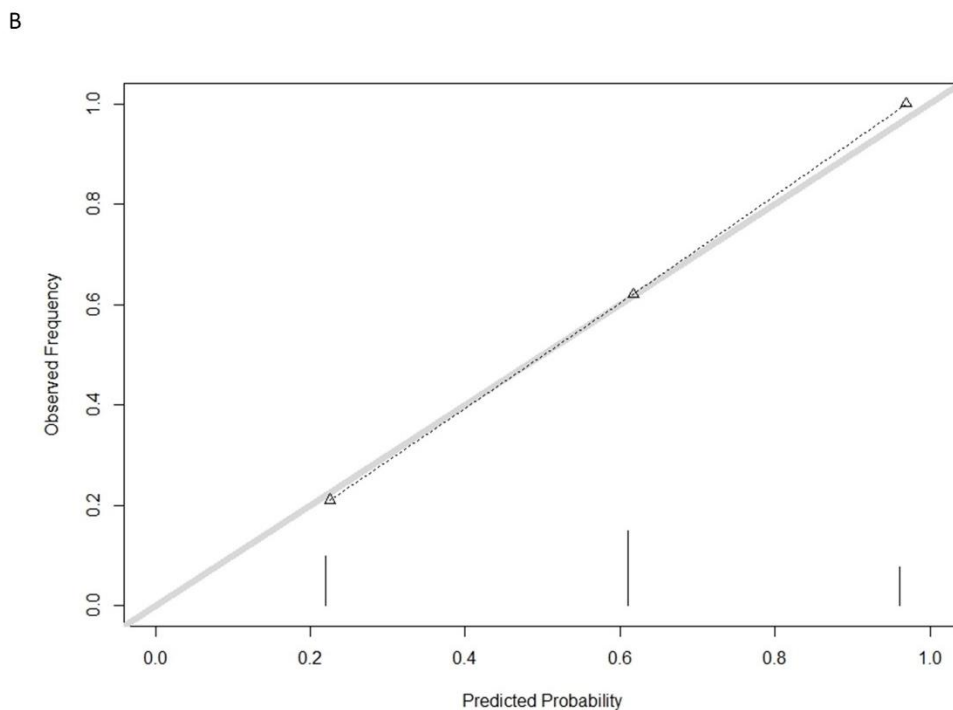

**Performance measures of CT-based diagnostic prediction model without APOE genotype in the development dataset (n = 62) and following internal validation using the same dataset (n = 62; 2,000 bootstrap samples).**

|                              | Development               | Internal validation       |
|------------------------------|---------------------------|---------------------------|
| <b>Overall</b>               |                           |                           |
| Brier score                  | 0.16                      | 0.17                      |
| R <sup>2</sup> (Nagelkerke)  | 0.31                      | 0.28                      |
| Akaike information criterion | 65.03                     | 68.90                     |
| <b>Discrimination</b>        |                           |                           |
| c statistic                  | 0.82                      | 0.82                      |
| Discrimination slope         | 0.32                      | 0.31                      |
| <b>Calibration</b>           |                           |                           |
| Hosmer-Lemeshow test         | $\chi^2 = 0.48, p = 0.92$ | $\chi^2 = 1.35, p = 0.72$ |



**Risk categories for lobar ICH associated with moderate/severe CAA using CT-based diagnostic criteria without APOE genotype**

| Predictors present       |                         | Predicted risk of moderate/severe CAA, % | Observed frequency of moderate/severe CAA (%) [95% CI] |          | Moderate/severe CAA probability |
|--------------------------|-------------------------|------------------------------------------|--------------------------------------------------------|----------|---------------------------------|
| Subarachnoid haemorrhage | Finger-like projections |                                          |                                                        |          |                                 |
| -                        | -                       | 23                                       | 4/19 (21)                                              | [9-43]   | Low                             |
| +                        | -                       | 62                                       | 18/29 (62)                                             | [44-77]  | Medium                          |
| +                        | +                       | 97                                       | 14/14 (100)                                            | [78-100] | High                            |

**Cross tabulations of the index test results against the reference standard using the simplified Edinburgh (CT-only) CAA-associated lobar ICH diagnostic criteria**

| <b>Diagnostic criteria (index test)</b>                     | <b>Reference standard</b>                 |                 | <b>Total</b> |
|-------------------------------------------------------------|-------------------------------------------|-----------------|--------------|
|                                                             | <b>Moderate/severe CAA at post mortem</b> | <b>Negative</b> |              |
| <b>Subarachnoid haemorrhage</b>                             |                                           |                 |              |
| Positive                                                    | 32                                        | 11              | 43           |
| Negative                                                    | 4                                         | 15              | 19           |
| <b>Total</b>                                                | <b>36</b>                                 | <b>26</b>       | <b>62</b>    |
| <b>Diagnostic criteria (index test)</b>                     | <b>Reference standard</b>                 |                 | <b>Total</b> |
| <b>Subarachnoid haemorrhage and finger-like projections</b> | <b>Moderate/severe CAA at post mortem</b> | <b>Negative</b> |              |
| Positive                                                    | 14                                        | 0               | 14           |
| Negative                                                    | 22                                        | 26              | 48           |
| <b>Total</b>                                                | <b>36</b>                                 | <b>26</b>       | <b>62</b>    |

**Diagnostic test accuracy statistics for the simplified Edinburgh (CT-only) CAA-associated lobar ICH diagnostic criteria without APOE genotype**

|                                  | Diagnostic criteria      |                                                      |
|----------------------------------|--------------------------|------------------------------------------------------|
|                                  | Subarachnoid haemorrhage | Subarachnoid haemorrhage and finger-like projections |
| <b>Sensitivity</b>               | 89 (73-96)               | 39 (24-56)                                           |
| <b>Specificity</b>               | 58 (37-76)               | 100 (84-100)                                         |
| <b>Positive likelihood ratio</b> | 2.1 (1.3-3.3)            | Inf (NaN-∞)                                          |
| <b>Negative likelihood ratio</b> | 0.2 (0.1-0.5)            | 0.6 (0.5-0.8)                                        |
| <b>Positive predictive value</b> | 74 (59-86)               | 100 (73-100)                                         |
| <b>Negative predictive value</b> | 79 (54-93)               | 54 (39-68)                                           |
| <b>Youden's Index</b>            | 0.47                     | 0.39                                                 |

Data are percentage or ratio (95% confidence interval). NaN = not a number – calculation cannot be performed because one of the values includes a zero.

**Unique MRC Brain Brank Network (BBN) numbers of included participants**

|              |              |              |           |              |
|--------------|--------------|--------------|-----------|--------------|
| BBN_7268     | BBN_2561     | BBN_14393    | BBN_19602 | BBN_24323    |
| BBN_2519     | BBN001.26127 | BBN_19993    | BBN_19601 | BBN_24343    |
| BBN_2514     | BBN_2563     | BBN_9507     | BBN_19599 | BBN_24528    |
| BBN_15254    | BBN_2570     | BBN001.26492 | BBN_19600 | BBN_25059    |
| BBN_2554     | BBN_2573     | BBN_7276     | BBN_19598 | BBN_24670    |
| BBN_2524     | BBN_15813    | BBN_9504     | BBN_19364 | BBN_24531    |
| BBN001.26092 | BBN_4173     | BBN_9502     | BBN_19596 | BBN_25060    |
| BBN_2583     | BBN_20599    | BBN_9506     | BBN_22228 | BBN_25057    |
| BBN_2526     | BBN_2578     | BBN_15215    | BBN_20994 | BBN_25058    |
| BBN_3776     | BBN_2582     | BBN20615     | BBN_20611 | BBN001.26493 |
| BBN_2535     | BBN_20602    | BBN_15815    | BBN_20603 | BBN001.26394 |
| BBN_3769     | BBN_3763     | BBN_24305    | BBN_22224 | BBN001.26491 |
| BBN_2527     | BBN_3764     | BBN_15224    | BBN_24302 | BBN001.26490 |
| BBN_2539     | BBN_3766     | BBN_20992    | BBN_22227 | BBN001.26496 |
| BBN_2543     | BBN_3777     | BBN001.26307 | BBN_22223 | BBN001.26499 |
| BBN_2574     | BBN_3775     | BBN_15812    | BBN_22226 | BBN001.26719 |
| BBN_2545     | BBN_19994    | BBN_15814    | BBN_22626 | BBN001.26722 |
| BBN_2544     | BBN_3781     | BBN_15811    | BBN_22627 | BBN001.28404 |
| BBN_2546     | BBN_3782     | BBN_19605    | BBN_23394 | BBN001.28405 |
| BBN_19597    | BBN_7627     | BBN_19606    | BBN_24303 | BBN001.28408 |
| BBN_2548     | BBN_3787     | BBN_19604    | BBN_24304 | BBN001.28411 |
| BBN_2549     | BBN_4167     | BBN_19603    | BBN_24306 | BBN001.28416 |

## Reference List

1. Newman GC. Clarification of abc/2 rule for ICH volume. *Stroke* 2007; **38**(3): 862.
2. van Swieten JC, Hijdra A, Koudstaal PJ, van Gijn J. Grading white matter lesions on CT and MRI: a simple scale. *J Neurol Neurosurg Psychiatry* 1990; **53**(12): 1080-3.
3. Sato S, Delcourt C, Heeley E, et al. Significance of Cerebral Small-Vessel Disease in Acute Intracerebral Hemorrhage. *Stroke* 2016; **47**(3): 701-7.
4. Charidimou A, Schmitt A, Wilson D, et al. The Cerebral Haemorrhage Anatomical Rating Instrument (CHARTS): Development and assessment of reliability. *J Neurol Sci* 2017; **372**: 178-83.
5. Samarasekera N, Lerpiniere C, Fonville AF, et al. Consent for Brain Tissue Donation after Intracerebral Haemorrhage: A Community-Based Study. *PLoS One* 2015; **10**(8): e0135043.
6. Samarasekera N, Al-Shahi SR, Huitinga I, et al. Brain banking for neurological disorders. *Lancet Neurol* 2013; **12**(11): 1096-105.
